# Supplementary material
Source: publisher figshare collection journal article supplement (https://acs.figshare.com/ndownloader/files/18051377)
Supplement: Supplementary file 1 [file 18051377]

## Supporting information

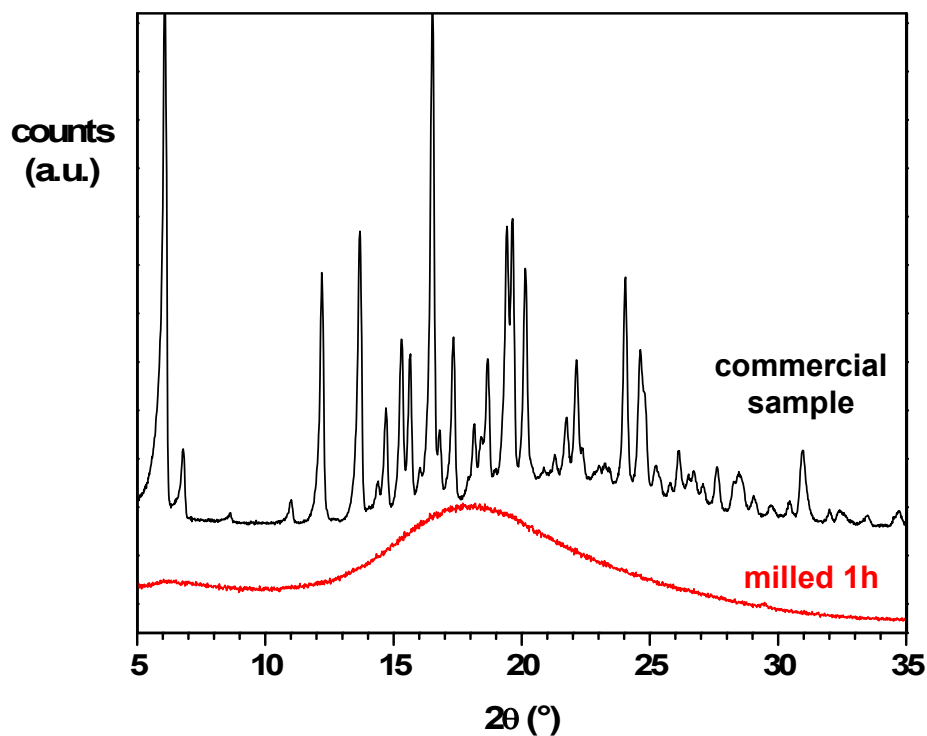

*Figure S1: X-rays diffraction pattern of Terfenadine recorded before and after milling. The powder X-ray diffraction experiments were performed with an XPERT PRO MPD diffractometer ( $\lambda_{\text{Cu K}\alpha} = 1.540 \text{ \AA}$ ) equipped with an X'celerator detector. Samples were placed into Lindemann glass capillaries ( $\varnothing = 0.7 \text{ mm}$ ).*

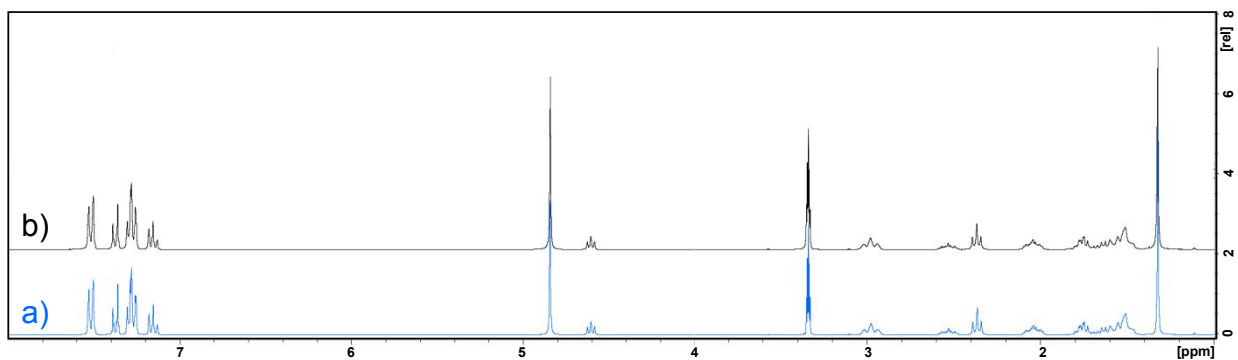

Figure S2:  $^1\text{H}$  NMR of Terfenadine dissolved in deuterated methanol: a) commercial product; b) after a 4 hours milling

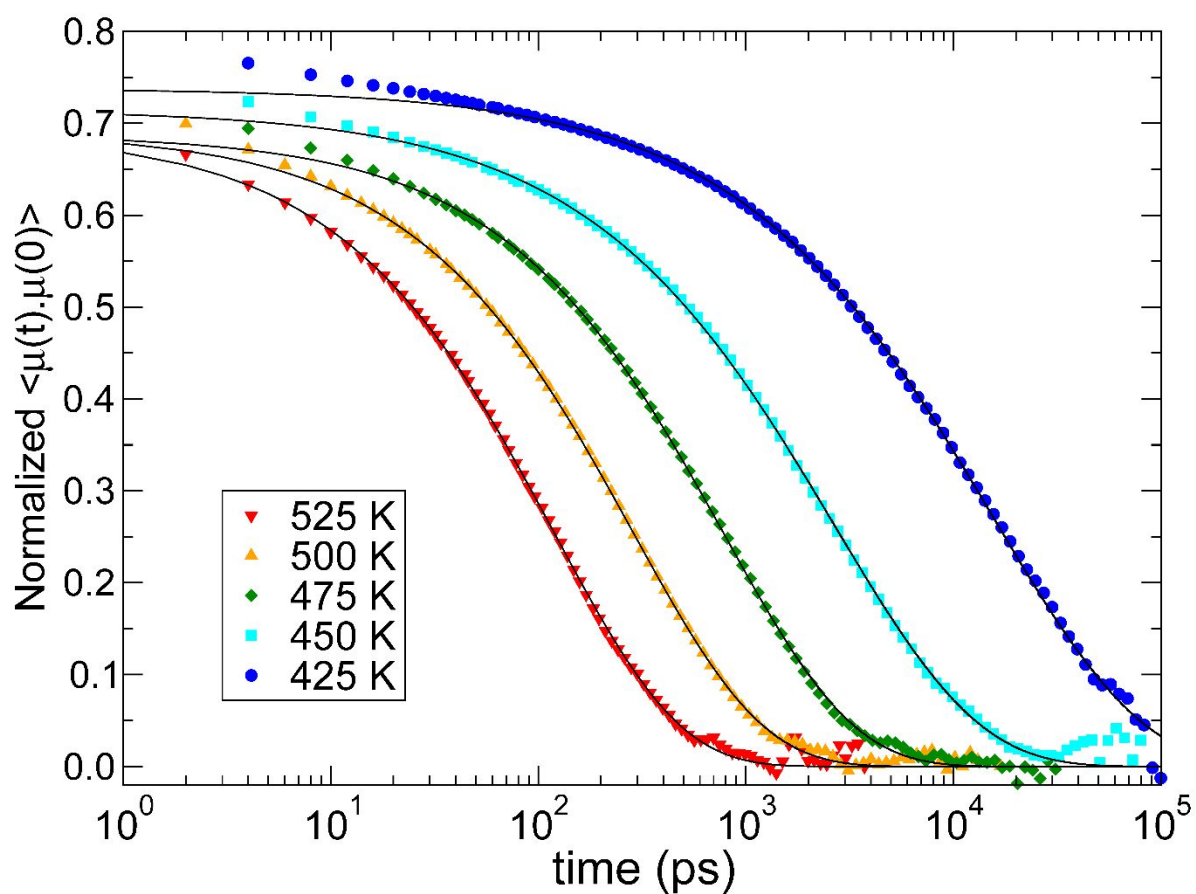

Figure S3: Dipole-dipole time-dependent self-correlation function of Terfenadine in the liquid state obtained from MD simulations at different temperatures. The dependence at long times are

*fitted by the expression:  $\Phi_{\mu}(t) = A_{\mu} \exp \left[ - \left( \frac{t}{\tau_{\mu}^{(MD)}} \right)^{\beta_{\mu}^{(MD)}} \right]$ , where  $A_{\mu}$  is the amplitude of the*

*$\Phi_{\mu}(t)$  function,  $\tau_{\mu}^{(MD)}$  is the characteristic time associated with the long time decay and  $\beta_{\mu}^{(MD)}$  is a parameter describing the non-exponentiality of the decay. These fits are represented as solid lines.*
